# Supplementary material for: Incorporation of d-alanine into poly(ethylene glycol) and l-poly(alanine-co-phenylalanine) block copolymers affects their nanoassemblies and enzymatic degradation
Source: Royal Society of Chemistry journal article supplement (doi:10.1039/c3sm51272j), 2013-01-01

## **Supporting information**

**Incorporation of D-alanine into poly(ethylene glycol) and L-  
poly(alanine-co-phenyl alanine) block copolymers affects their nano  
assemblies and enzymatic degradation**

Min Kyung Joo, Du Young Ko, Sun Jung Jeong, Min Hee Park, Usha Pramod Shinde,  
and Byeongmoon Jeong\*

**Fig. S1.** The ellipticity of the PEG-PAF at 222 nm as a function of the mole fraction of the D-NCA-A in the feed.  $f_D = \text{D-NCA-A}/(\text{D-NCA-A} + \text{L-NCA-A})$ .

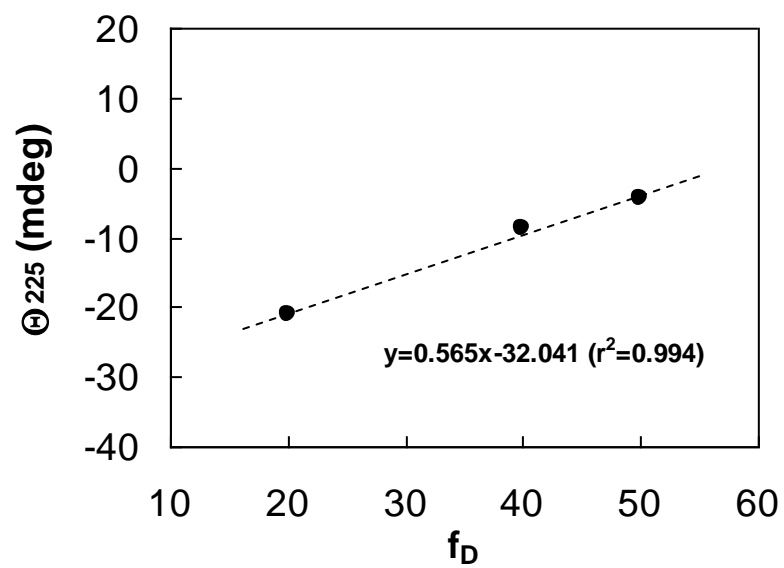

**Fig. S2.** DSC thermogram of PEG (2,000 Daltons).

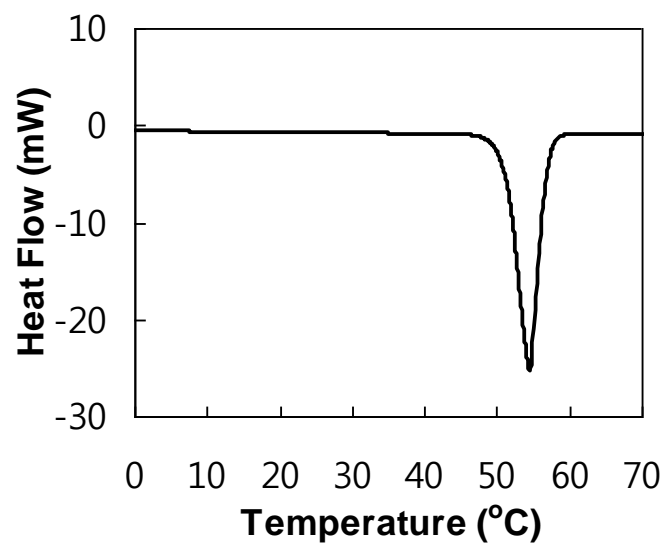

**Fig. S3.** Circular dichroism spectra of PII and PIV aqueous solutions at 15 °C as a function of concentration. Polymer aqueous solutions of 0.001, 0.005, 0.01, 0.05, and 0.10 wt % were used for each polymer. Enlarged spectra (insert) are also shown for the lower concentrations of 0.001, 0.005, and 0.01 wt.%.

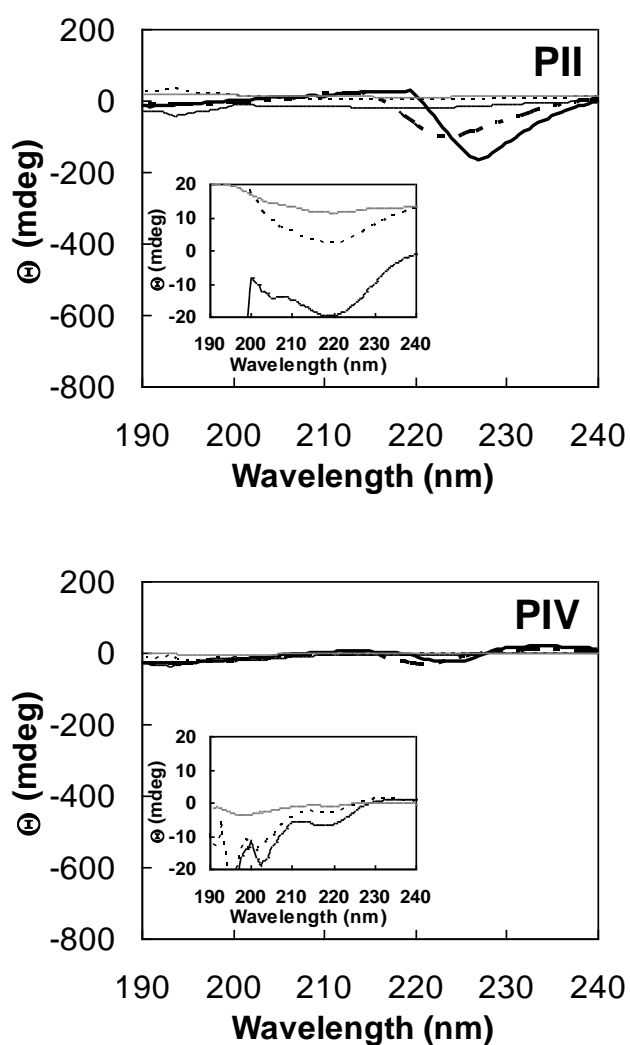

**Fig. S4.** Circular dichroism spectra of PII and PIV aqueous solutions (0.01 wt.%) as a function of temperature.

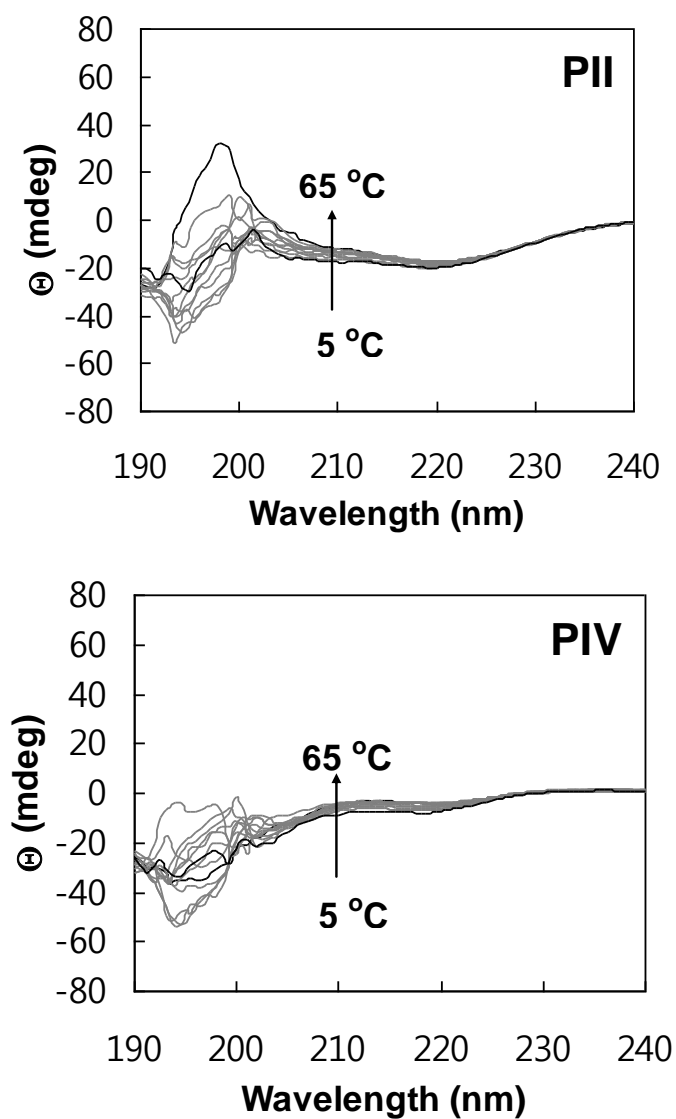

**Fig. S5.** FTIR spectra of PII, PIII, and PIV aqueous solutions (18.0 wt.%) in D<sub>2</sub>O as a function of temperature.

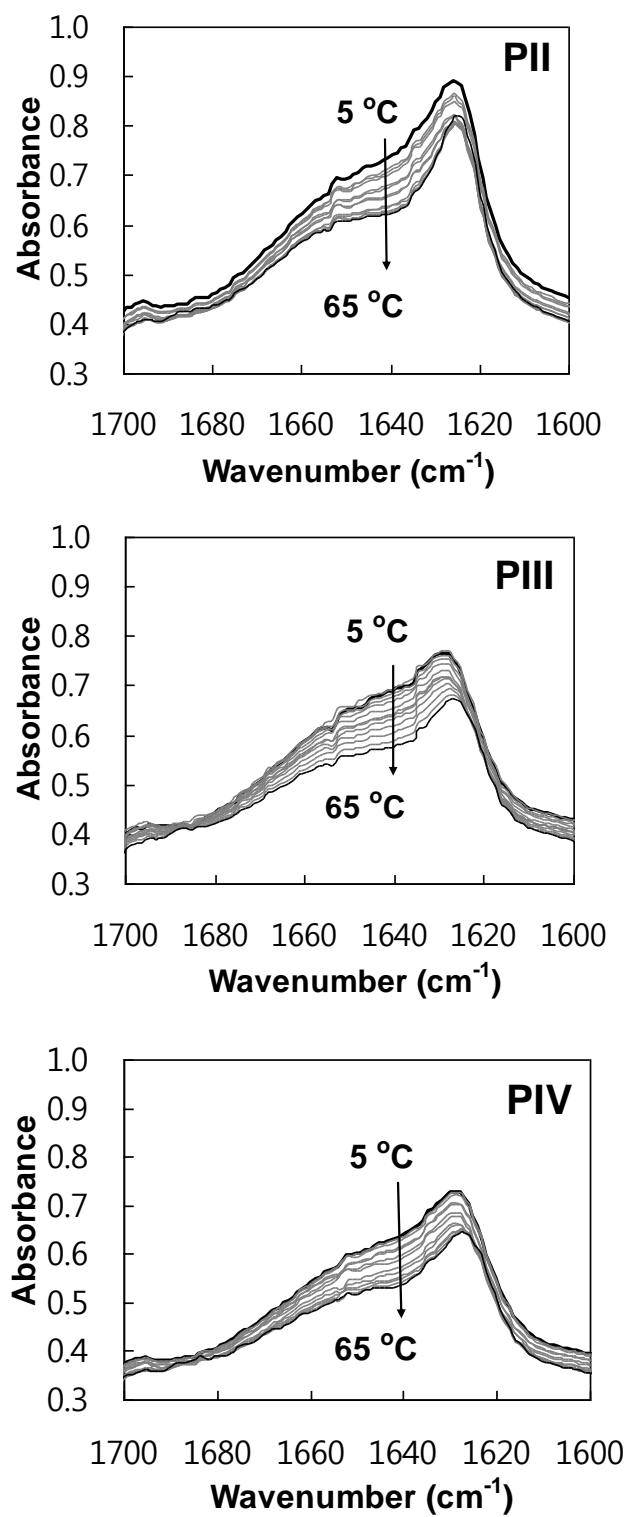

Supplement: c3sm51272j.pdf [file c3sm51272j.pdf]
